# Supplementary material
Source: HighWire-hosted journal article supplement (https://www.jneurosci.org/highwire/filestream/600454/field_highwire_adjunct_files/1/Supplemental_Legend.pdf)
Supplement: Supplemental_Legend.pdf [file Supplemental_Legend.pdf]

## Supplemental Material

Figure 1 (A) Percentage of misses during CTET performance as a function of within-block time-on-task. Time-on-task was calculated using 11 time-bins containing 40 trials with 50% overlap, thus each step on the X axis represents approximately 15-seconds of task performance. A significant time-on-task increase in errors was observed. (B) Percentage of misses across the 10 CTET testing blocks. There was no significant time-on-task effect across the testing session.
